# Supplementary material for: Complete genomes of the eukaryotic poultry parasite Histomonas meleagridis: linking sequence analysis with virulence / attenuation
Source: PubMed Central journal article supplement (PMC8529796; doi:10.1186/s12864-021-08059-2), 2021-10-21

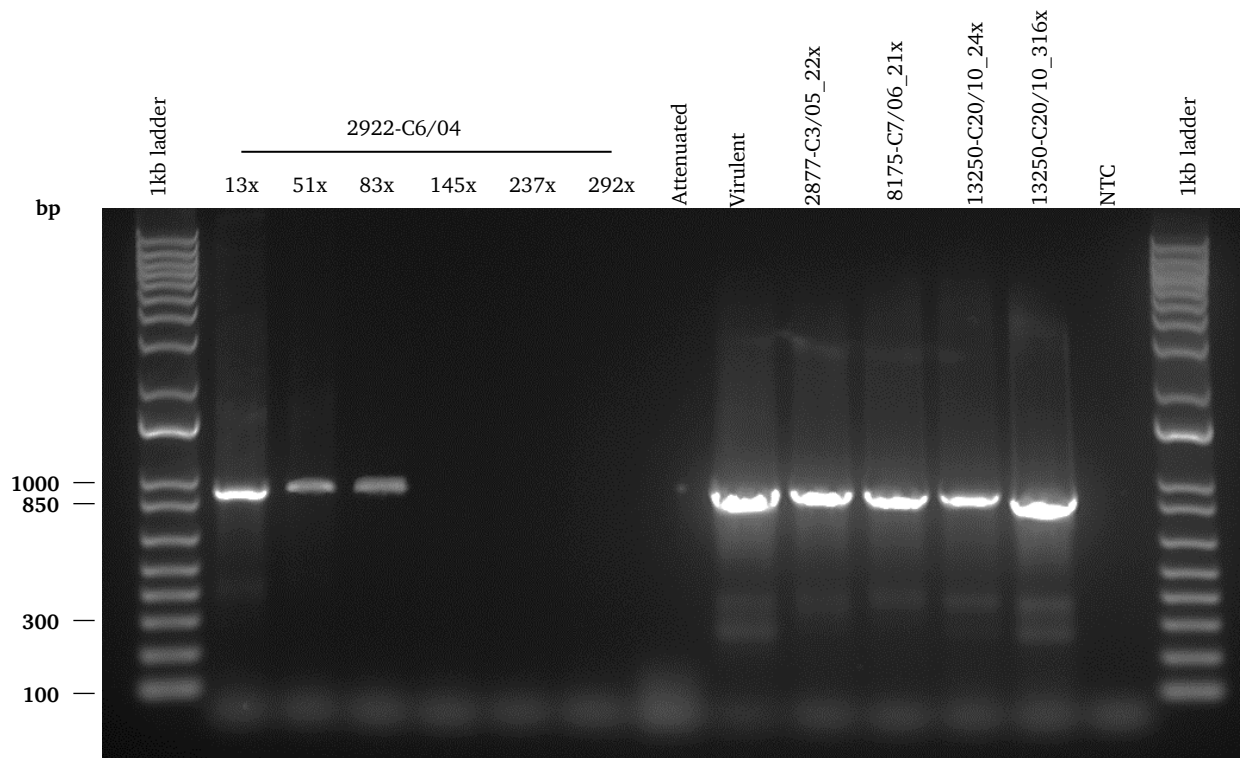

Supplement: 12864_2021_8059_MOESM1_ESM.pdf [file 12864_2021_8059_MOESM1_ESM.pdf]
