# Supplementary material for: Complete genomes of the eukaryotic poultry parasite Histomonas meleagridis: linking sequence analysis with virulence / attenuation
Source: BMC Genomics. 2021 Oct 21;22:753. doi: 10.1186/s12864-021-08059-2 (PMC8529796; doi:10.1186/s12864-021-08059-2)
Supplement: Supplementary file 3 — Additional file 3: Fig. S3. Nucleotide alignment of the indel region. [file 12864_2021_8059_MOESM3_ESM.pdf]

Consensus CGTTCCTTCTCTCAGATTTTGGTACAGCCCTAATTGAAAAATCTGATAGTCAAGAATTAATCGTTCATCCATTGTTGGAACCTCCAGCCTTTGTTGCCCCAGAGCTCCTTAATGATGGAAA

10 20 30 40 50 60 70 80 90 100 110 120

virulent\_2922-C6/04/DH5alpha\_24x CGTTCCTTCTCTCAGATTTTGGTACAGCCCTAATTGAAAAATCTGATAGTCAAGAATTAATCGTTCATCCATTGTTGGAACCTCCAGCCTTTGTTGCCCCAGAGCTCCTTAATGATGGAAA 120

attenuated\_2922-C6/04/DH5alpha\_295x CGTTCCTTCTCTCAGATTTTGGTACAGCCCTAATTGAAAAATCTGATAGTCAAGAATTAATCGTTCATCCATTGTTG- AACTCCAGCCTTTGTTGCCCCAGAGCTCCTTAATGATGGAAA 119

2922-C6/04\_13x CGTTCCTTCTCTCAGATTTTGGTACAGCCCTAATTGAAAAATCTGATAGTCAAGAATTAATCGTTCATCCATTGTTGGAACCTCCAGCCTTTGTTGCCCCAGAGCTCCTTAATGATGGAAA 120

2922-C6/04\_51x CGTTCCTTCTCTCAGATTTTGGTACAGCCCTAATTGAAAAATCTGATAGTCAAGAATTAATCGTTCATCCATTGTTGGAACCTCCAGCCTTTGTTGCCCCAGAGCTCCTTAATGATGGAAA 120

2922-C6/04\_83x CGTTCCTTCTCTCAGATTTTGGTACAGCCCTAATTGAAAAATCTGATAGTCAAGAATTAATCGTTCATCCATTGTTGGAACCTCCAGCCTTTGTTGCCCCAGAGCTCCTTAATGATGGAAA 120

2922-C6/04\_145x CGTTCCTTCTCTCAGATTTTGGTACAGCCCTAATTGAAAAATCTGATAGTCAAGAATTAATCGTTCATCCATTGTTG- AACTCCAGCCTTTGTTGCCCCAGAGCTCCTTAATGATGGAAA 119

2922-C6/04\_237x CGTTCCTTCTCTCAGATTTTGGTACAGCCCTAATTGAAAAATCTGATAGTCAAGAATTAATCGTTCATCCATTGTTG- AACTCCAGCCTTTGTTGCCCCAGAGCTCCTTAATGATGGAAA 119

2922-C6/04\_292x CGTTCCTTCTCTCAGATTTTGGTACAGCCCTAATTGAAAAATCTGATAGTCAAGAATTAATCGTTCATCCATTGTTG- AACTCCAGCCTTTGTTGCCCCAGAGCTCCTTAATGATGGAAA 119

8175-C7/06\_21x CGTTCCTTCTCTCAGATTTTGGTACAGCCCTAATTGAAAAATCTGATAGTCAAGAATTAATCGTTCATCCATTGTTGGAACCTCCAGCCTTTGTTGCCCCAGAGCTCCTTAATGATGGAAA 120

2877-C3/05\_24x CGTTCCTTCTCTCAGATTTTGGTACAGCCCTAATTGAAAAATCTGATAGTCAAGAATTAATCGTTCATCCATTGTTGGAACCTCCAGCCTTTGTTGCCCCAGAGCTCCTTAATGATGGAAA 120

13250-C2/010\_24x CGTTCCTTCTCTCAGATTTTGGTACAGCCCTAATTGAAAAATCTGATAGTCAAGAATTAATCGTTCATCCATTGTTGGAACCTCCAGCCTTTGTTGCCCCAGAGCTCCTTAATGATGGAAA 120

13250-C2/010\_316x CGTTCCTTCTCTCAGATTTTGGTACAGCCCTAATTGAAAAATCTGATAGTCAAGAATTAATCGTTCATCCATTGTTGGAACCTCCAGCCTTTGTTGCCCCAGAGCTCCTTAATGATGGAAA 120

Consensus AATCTGTTATAGTTCTGATATGTGGTCATTTGGTTGTGTGCATATTCAATCTTCTTACAGGCACAGCACCTTTTAGTGGACAAAACACAGTTGAATTAATGAACAACATCACTGAGCTTAA

130 140 150 160 170 180 190 200 210 220 230 240

virulent\_2922-C6/04/DH5alpha\_24x AATCTGTTATAGTTCTGATATGTGGTCATTTGGTTGTGTGCATATTCAATCTTCTTACAGGCACAGCACCTTTTAGTGGACAAAACACAGTTGAATTAATGAACAACATCACTGAGCTTAA 240

attenuated\_2922-C6/04/DH5alpha\_295x AATCTGTTATAGTTCTGATATGTGGTCATTTGGTTGTGTGCATATTCAATCTTCTTACAGGCACAGCACCTTTTAGTGGACAAAACACAGTTGAATTAATGAACAACATCACTGAGCTTAA 239

2922-C6/04\_13x AATCTGTTATAGTTCTGATATGTGGTCATTTGGTTGTGTGCATATTCAATCTTCTTACAGGCACAGCACCTTTTAGTGGACAAAACACAGTTGAATTAATGAACAACATCACTGAGCTTAA 240

2922-C6/04\_51x AATCTGTTATAGTTCTGATATGTGGTCATTTGGTTGTGTGCATATTCAATCTTCTTACAGGCACAGCACCTTTTAGTGGACAAAACACAGTTGAATTAATGAACAACATCACTGAGCTTAA 240

2922-C6/04\_83x AATCTGTTATAGTTCTGATATGTGGTCATTTGGTTGTGTGCATATTCAATCTTCTTACAGGCACAGCACCTTTTAGTGGACAAAACACAGTTGAATTAATGAACAACATCACTGAGCTTAA 240

2922-C6/04\_145x AATCTGTTATAGTTCTGATATGTGGTCATTTGGTTGTGTGCATATTCAATCTTCTTACAGGCACAGCACCTTTTAGTGGACAAAACACAGTTGAATTAATGAACAACATCACTGAGCTTAA 239

2922-C6/04\_237x AATCTGTTATAGTTCTGATATGTGGTCATTTGGTTGTGTGCATATTCAATCTTCTTACAGGCACAGCACCTTTTAGTGGACAAAACACAGTTGAATTAATGAACAACATCACTGAGCTTAA 239

2922-C6/04\_292x AATCTGTTATAGTTCTGATATGTGGTCATTTGGTTGTGTGCATATTCAATCTTCTTACAGGCACAGCACCTTTTAGTGGACAAAACACAGTTGAATTAATGAACAACATCACTGAGCTTAA 239

8175-C7/06\_21x AATCTGTTATAGTTCTGATATGTGGTCATTTGGTTGTGTGCATATTCAATCTTCTTACAGGCACAGCACCTTTTAGTGGACAAAACACAGTTGAATTAATGAACAACATCACTGAGCTTAA 240

2877-C3/05\_24x AATCTGTTATAGTTCTGATATGTGGTCATTTGGTTGTGTGCATATTCAATCTTCTTACAGGCACAGCACCTTTTAGTGGACAAAACACAGTTGAATTAATGAACAACATCACTGAGCTTAA 240

13250-C2/010\_24x AATCTGTTATAGTTCTGATATGTGGTCATTTGGTTGTGTGCATATTCAATCTTCTTACAGGCACAGCACCTTTTAGTGGACAAAACACAGTTGAATTAATGAACAACATCACTGAGCTTAA 240

13250-C2/010\_316x AATCTGTTATAGTTCTGATATGTGGTCATTTGGTTGTGTGCATATTCAATCTTCTTACAGGCACAGCACCTTTTAGTGGACAAAACACAGTTGAATTAATGAACAACATCACTGAGCTTAA 240

Consensus GTTTAATCCAGTCATTAATAACACTTCCGAAAACCGCCAAAGATCTCATCACATCCTTACTTAAGCTTGATCCACACGAGCGTATTGGATACGGGGAAGCCAAAG

250 260 270 280 290 300 310 320 330 340

virulent\_2922-C6/04/DH5alpha\_24x GTTTAATCCAGTCATTAATAACACTTCCGAAAACCGCCAAAGATCTCATCACATCCTTACTTAAGCTTGATCCACACGAGCGTATTGGATACGGGGAAGCCAAAG 344

attenuated\_2922-C6/04/DH5alpha\_295x GTTTAATCCAGTCATTAATAACACTTCCGAAAACCGCCAAAGATCTCATCACATCCTTACTTAAGCTTGATCCACACGAGCGTATTGGATACGGGGAAGCCAAAG 343

2922-C6/04\_13x GTTTAATCCAGTCATTAATAACACTTCCGAAAACCGCCAAAGATCTCATCACATCCTTACTTAAGCTTGATCCACACGAGCGTATTGGATACGGGGAAGCCAAAG 344

2922-C6/04\_51x GTTTAATCCAGTCATTAATAACACTTCCGAAAACCGCCAAAGATCTCATCACATCCTTACTTAAGCTTGATCCACACGAGCGTATTGGATACGGGGAAGCCAAAG 344

2922-C6/04\_83x GTTTAATCCAGTCATTAATAACACTTCCGAAAACCGCCAAAGATCTCATCACATCCTTACTTAAGCTTGATCCACACGAGCGTATTGGATACGGGGAAGCCAAAG 344

2922-C6/04\_145x GTTTAATCCAGTCATTAATAACACTTCCGAAAACCGCCAAAGATCTCATCACATCCTTACTTAAGCTTGATCCACACGAGCGTATTGGATACGGGGAAGCCAAAG 343

2922-C6/04\_237x GTTTAATCCAGTCATTAATAACACTTCCGAAAACCGCCAAAGATCTCATCACATCCTTACTTAAGCTTGATCCACACGAGCGTATTGGATACGGGGAAGCCAAAG 343

2922-C6/04\_292x GTTTAATCCAGTCATTAATAACACTTCCGAAAACCGCCAAAGATCTCATCACATCCTTACTTAAGCTTGATCCACACGAGCGTATTGGATACGGGGAAGCCAAAG 343

8175-C7/06\_21x GTTTAATCCAGTCATTAATAACACTTCCGAAAACCGCCAAAGATCTCATCACATCCTTACTTAAGCTTGATCCACACGAGCGTATTGGATACGGGGAAGCCAAAG 344

2877-C3/05\_24x GTTTAATCCAGTCATTAATAACACTTCCGAAAACCGCCAAAGATCTCATCACATCCTTACTTAAGCTTGATCCACACGAGCGTATTGGATACGGGGAAGCCAAAG 344

13250-C2/010\_24x GTTTAATCCAGTCATTAATAACACTTCCGAAAACCGCCAAAGATCTCATCACATCCTTACTTAAGCTTGATCCACACGAGCGTATTGGATACGGGGAAGCCAAAG 344

13250-C2/010\_316x GTTTAATCCAGTCATTAATAACACTTCCGAAAACCGCCAAAGATCTCATCACATCCTTACTTAAGCTTGATCCACACGAGCGTATTGGATACGGGGAAGCCAAAG 344
